# Supplementary material for: A Brain Phenotype for Stressor‐Evoked Blood Pressure Reactivity
Source: PubMed Central journal article supplement — J Am Heart Assoc. 2017 Aug 23;6(9):e006053. doi: 10.1161/JAHA.117.006053 (PMC5634271; doi:10.1161/jaha.117.006053), 2017-08-23
Supplement: JAH3-6-e006053-s001.pdf [file JAH3-6-e006053-s001.pdf]

# **SUPPLEMENTAL MATERIAL**

**Table S1. The training sample (N = 206) vs. the test (cross-validation) sample (N = 104).**

| <i>Characteristic</i>                    | Training Sample           |            | Test Sample             |           |
|------------------------------------------|---------------------------|------------|-------------------------|-----------|
|                                          | N = 206                   |            | N = 104                 |           |
|                                          | <u>106 Women. 100 Men</u> |            | <u>47 Women. 57 Men</u> |           |
|                                          | <i>Mean or</i>            | <i>SD</i>  | <i>Mean or</i>          | <i>SD</i> |
|                                          | <i>or 95% CI</i>          |            | <i>or 95% CI</i>        |           |
|                                          | <i>(%)</i>                | <i>(%)</i> | <i>or 95% CI</i>        |           |
| Age (years)                              | 40.1                      | 6.4        | 40.6                    | 6.1       |
| Race (%)                                 |                           |            |                         |           |
| Caucasian                                | 70.4                      |            | 71.2                    |           |
| African American,                        | 23.8                      |            | 22.1                    |           |
| Multi-racial, other                      | 5.8                       |            | 6.7                     |           |
| Body mass index (kg/m <sup>2</sup> )     | 26.9                      | 5.2        | 26.7                    | 4.6       |
| Total cholesterol (mg/dL)                | 186.0                     | 32.5       | 179.7                   | 32.0      |
| Triglycerides (mg/dL)                    | 93.0                      | 56.9       | 97.5                    | 60.7      |
| HDL (mg/dL)                              | 51.6                      | 17.7       | 49.0                    | 13.1      |
| Glucose (mg/dL)                          | 88.7                      | 11.0       | 88.6                    | 10.7      |
| Number of school years completed         | 16.8                      | 3.4        | 16.5                    | 3.1       |
| Seated Resting SBP (mmHg)                | 120.4                     | 9.8        | 120.8                   | 9.9       |
| Seated Resting DBP (mmHg)                | 71.9                      | 8.3        | 73.5                    | 8.8       |
| Smoking Status (%)                       |                           |            |                         |           |
| Current                                  | 16.5                      |            | 17.3                    |           |
| Former                                   | 21.4                      |            | 16.3                    |           |
| Never                                    | 62.1                      |            | 66.3                    |           |
| Depressive symptoms (BDI-II)             | 3.4                       | 3.6        | 3.8                     | 3.5       |
| Trait anxiety (STAI-T)                   | 32.5                      | 7.3        | 33.8                    | 7.6       |
| Trait hostility (CMHS-T)                 | 13.9                      | 7.6        | 14.5                    | 7.6       |
| <b>Task accuracy (% correct)</b>         |                           |            |                         |           |
| MSIT congruent condition                 | 91.1                      | 7.9        | 91.8                    | 4.2       |
| MSIT incongruent condition               | 56.9                      | 7.0        | 56.1                    | 9.4       |
| Stroop congruent condition               | 84.5                      | 10.3       | 84.6                    | 8.1       |
| Stroop incongruent condition             | 55.7                      | 9.8        | 55.0                    | 11.1      |
| <b>Task reaction time (milliseconds)</b> |                           |            |                         |           |
| MSIT congruent condition                 | 544.2                     | 119.6      | 539.5                   | 111.3     |
| MSIT incongruent condition               | 902.7                     | 198.1      | 894.9                   | 211.6     |

|                                            |        |              |        |              |
|--------------------------------------------|--------|--------------|--------|--------------|
| Stroop congruent condition                 | 1293.6 | 302.3        | 1313.3 | 287.8        |
| Stroop incongruent condition               | 1861.4 | 485.4        | 1886.4 | 442.6        |
| <b>Changes from baseline in valence</b>    |        |              |        |              |
| MSIT                                       | -1.0   | (-1.3, -0.8) | -1.4   | (-1.7, -1.0) |
| Stroop                                     | -1.5   | (-1.8, -1.2) | -1.7   | (-2.0, -1.4) |
| <b>Changes from baseline in arousal</b>    |        |              |        |              |
| MSIT                                       | 2.6    | (2.2, 2.9)   | 2.6    | (2.2, 3.0)   |
| Stroop                                     | 3.0    | (2.6, 3.3)   | 3.3    | (2.8, 3.7)   |
| <b>Changes from baseline in SBP (mmHg)</b> |        |              |        |              |
| MSIT                                       | 3.5    | (2.8, 4.2)   | 3.4    | (2.3, 4.5)   |
| Stroop                                     | 4.9    | (4.0, 5.8)   | 5.0    | (3.7, 6.3)   |
| <b>Changes from baseline in DBP (mmHg)</b> |        |              |        |              |
| MSIT                                       | 1.3    | (0.7, 1.9)   | 1.5    | (0.7, 2.3)   |
| Stroop                                     | 2.1    | (1.3, 2.8)   | 2.4    | (1.6, 3.3)   |
| <b>Changes from baseline in HR (BPM)</b>   |        |              |        |              |
| MSIT                                       | 5.9    | (5.2, 6.7)   | 6.6    | (5.6, 7.6)   |
| Stroop                                     | 7.9    | (7.0, 8.7)   | 8.6    | (7.3, 9.9)   |

Note. Data are presented as number (or percentage), mean  $\pm$  SD, or mean and 95% confidence interval (CI). HDL, high-density lipoproteins; LDL, low-density lipoproteins; SBP, systolic blood pressure; DBP, diastolic blood pressure; BDI-II, Beck Depression Inventory-II; STAI-T, State-Trait Anxiety Inventory-Trait version; CMHS-T, Cook-Medley Hostility Inventory-Trait version; MSIT, Multi-Source Interference Task.

**Table S2. Stressor-evoked brain activation revealed at a family-wise error rate corrected threshold of  $P < 0.05$ .**

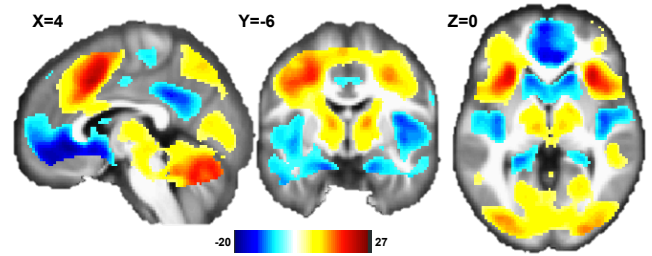

| Effect                                         | Region Label                                  | Peak MNI Coordinates                |     |     | Peak t-value | Cluster Size |      |
|------------------------------------------------|-----------------------------------------------|-------------------------------------|-----|-----|--------------|--------------|------|
|                                                |                                               | x                                   | y   | z   |              |              |      |
| Positive                                       | L/R Superior Medial Gyrus/Mid-ACC/dorsal ACC  | ±8                                  | 14  | 46  | 27.40        | 18707        |      |
|                                                | L/R Inferior Frontal Gyrus (pars Opercularis) | ±40                                 | 4   | 28  | 24.08        |              |      |
|                                                | L/R Anterior Insula                           | ±32                                 | 22  | 4   | 22.90        |              |      |
|                                                | L/R Precentral Gyrus                          | ±30                                 | 0   | 52  | 22.02        |              |      |
|                                                | L/R Middle Frontal Gyrus                      | ±32                                 | 48  | 14  | 16.41        |              |      |
|                                                | L/R Inferior Parietal Lobule                  | ±30                                 | -60 | 44  | 23.12        | 22787        |      |
|                                                | L/R Precuneus                                 | ±12                                 | -72 | 48  | 21.43        |              |      |
|                                                | L/R Middle Occipital Gyrus                    | ±32                                 | -80 | 20  | 20.04        |              |      |
|                                                | L/R Superior Occipital Gyrus                  | -18                                 | -70 | 44  | 19.40        |              |      |
|                                                | L/R Cerebellum                                | ±32                                 | -68 | -24 | 19.89        |              |      |
|                                                | L/R Thalamus                                  | ±10                                 | -16 | 6   | 16.30        | 752/845      |      |
|                                                | R Periaqueductal Gray                         | 2                                   | -28 | -8  | 10.46        | 845          |      |
|                                                | R Middle Temporal Gyrus                       | 48                                  | -28 | -8  | 11.62        | 128          |      |
|                                                | Negative                                      | L/R Rectal Gyrus/subgenual ACC      | ±12 | 10  | -10          | -20.75       | 5640 |
|                                                |                                               | L Rectal Gyrus/vmPFC/perigenual ACC | 0   | 46  | -16          | -20.27       |      |
| L/R Superior Frontal Gyrus                     |                                               | ±16                                 | 40  | 48  | -15.37       |              |      |
| L/R Superior Medial Gyrus                      |                                               | ±8                                  | 62  | 6   | -12.79       |              |      |
| L/R Middle Orbital Gyrus                       |                                               | ±22                                 | 32  | -16 | -12.51       |              |      |
| L/R Poster Cingulate Cortex                    |                                               | 0                                   | -42 | 34  | -13.50       | 1056         |      |
| L/R Precuneus                                  |                                               | ±6                                  | -56 | 20  | -11.72       |              |      |
| L/R Angular Gyrus                              |                                               | ±52                                 | -70 | 32  | -20.06       | 695          |      |
| L/R Posterior Insula                           |                                               | ±38                                 | -18 | 16  | -16.23       | 570          |      |
| L/R Mid- Occipital Gyrus                       |                                               | ±54                                 | -70 | 30  | -16.13       | 286          |      |
| L/R Parahippocampal Gyrus/Hippocampus/Amygdala |                                               | ±24                                 | -16 | -22 | -15.81       | 869          |      |
| R Postcentral Gyrus                            |                                               | ±48                                 | -22 | 58  | -11.64       | 130          |      |
| L Inferior Temporal Gyrus                      |                                               | ±46                                 | 0   | -36 | -11.34       | 90           |      |
| R Superior Frontal Gyrus                       |                                               | 20                                  | 42  | 48  | -11.06       | 214          |      |
| L Middle Temporal Gyrus                        |                                               | -56                                 | -12 | -20 | -10.37       | 84           |      |

Note. Regions were labeled using bspmview (<https://github.com/spunt/bspmview>). ACC, anterior cingulate cortex; vmPFC, ventromedial prefrontal cortex.

**Table S3. Regions within the whole-brain multivariate weight map that positively predicted stressor-evoked SBP reactivity after applying a permutation threshold of  $P < 0.05$  and a voxel extent threshold of  $k=50$  (1000 permutations). Note that the whole-brain pattern was used in training and testing as described in the text.**

| Region Label                            | Extent | t-value | x   | y   | z   |
|-----------------------------------------|--------|---------|-----|-----|-----|
| L Middle Temporal Gyrus                 | 255    | 4.163   | -68 | -24 | -12 |
| L Paracentral Lobule                    | 783    | 3.877   | -18 | -24 | 70  |
| R Postcentral Gyrus                     | 694    | 3.565   | 44  | -24 | 54  |
| L Superior Occipital Gyrus              | 1042   | 3.406   | -18 | -72 | 34  |
| R Inferior Temporal Gyrus               | 454    | 3.399   | 60  | -50 | -18 |
| R Dorsal Anterior Cingulate             | 301    | 3.387   | 8   | 36  | 26  |
| R Insula                                | 421    | 2.793   | 34  | 24  | 14  |
| R Rolandic Operculum                    | 72     | 3.343   | 68  | 0   | 20  |
| R Cerebellum/Periaqueductal Gray        | 96     | 3.342   | 18  | -28 | -20 |
| R Cerebellar Vermis                     | 126    | 3.312   | 6   | -62 | -26 |
| L Dorsal Anterior Cingulate             | 68     | 3.236   | -2  | 22  | 16  |
| L Inferior Occipital Gyrus              | 113    | 3.146   | -52 | -78 | 0   |
| R Lingual Gyrus                         | 51     | 3.140   | 8   | -58 | 8   |
| R Cerebellum                            | 58     | 3.122   | 32  | -86 | -22 |
| L Rolandic Operculum                    | 141    | 3.110   | -40 | -14 | 22  |
| R Fusiform Gyrus                        | 111    | 3.107   | 38  | -10 | -30 |
| L Middle Frontal Gyrus                  | 164    | 3.055   | -34 | 10  | 56  |
| R Middle Frontal Gyrus                  | 167    | 3.052   | 34  | 14  | 44  |
| L Middle Frontal Gyrus                  | 146    | 3.035   | -24 | 30  | 32  |
| R Mid Orbital Gyrus, perigenual ACC     | 192    | 3.028   | 10  | 50  | -4  |
| L Cerebellum                            | 86     | 2.955   | -18 | -88 | -32 |
| L Inferior Parietal Lobule              | 71     | 2.940   | -36 | -50 | 38  |
| R Cerebellum                            | 62     | 2.937   | 26  | -34 | -46 |
| L Superior Orbital Gyrus                | 202    | 2.934   | -12 | 62  | 0   |
| L Superior Frontal Gyrus                | 202    | 2.164   | -30 | 66  | 10  |
| R Inferior Temporal Gyrus               | 102    | 2.926   | 42  | -58 | -4  |
| R Cerebellum                            | 51     | 2.924   | 18  | -62 | -16 |
| R Posterior Mid-Cingulate               | 82     | 2.917   | 4   | -44 | 48  |
| R Precentral Gyrus                      | 70     | 2.904   | 36  | -14 | 44  |
| L Lingual Gyrus                         | 127    | 2.895   | -2  | -94 | -14 |
| L Inferior Temporal Gyrus               | 186    | 2.835   | -38 | -42 | -10 |
| L IFG (p. Triangularis)                 | 50     | 2.731   | -56 | 30  | 6   |
| R ParaHippocampal Gyrus                 | 119    | 2.723   | 30  | -42 | -2  |
| R Paracentral Lobule                    | 63     | 2.714   | 10  | -36 | 58  |
| L IFG (p. Triangularis)                 | 138    | 2.685   | -54 | 28  | 22  |
| L Cerebellum                            | 98     | 2.646   | -46 | -50 | -30 |
| R Precuneus                             | 97     | 2.620   | 10  | -68 | 50  |
| R Posterior Mid-Cingulate               | 54     | 2.612   | 2   | -16 | 40  |
| L Mid Orbital Gyrus, Anterior Cingulate | 64     | 2.577   | -2  | 42  | 0   |
| R Superior Medial Gyrus                 | 54     | 2.534   | 4   | 52  | 8   |
| R Parahippocampal Gyrus                 | 52     | 2.509   | 36  | -34 | -8  |
| R Middle Temporal Gyrus                 | 121    | 2.473   | 50  | -70 | 26  |
| R Superior Medial Gyrus                 | 65     | 2.456   | 6   | 54  | 46  |
| R IFG (p. Orbitalis)                    | 50     | 2.347   | 36  | 30  | -16 |
| R Supramarginal Gyrus                   | 103    | 2.336   | 68  | -26 | 30  |
| L Superior Temporal Gyrus               | 54     | 2.319   | -64 | -36 | 26  |

**Table S4. Regions within the whole-brain multivariate weight map that negatively predicted stressor-evoked SBP reactivity after applying a permutation threshold of  $P < 0.05$  and a voxel extent threshold of  $k=50$ . Note that the whole-brain pattern was used in training and testing as described in the text.**

| Region Label                                    | Extent | t-value | x   | y   | z   |
|-------------------------------------------------|--------|---------|-----|-----|-----|
| L Paracentral Lobule                            | 256    | -4.030  | -4  | -42 | 78  |
| L Posterior Cingulate Cortex                    | 295    | -3.761  | -2  | -50 | 12  |
| R Superior Frontal Gyrus                        | 237    | -3.633  | 30  | -10 | 64  |
| L Middle Temporal Gyrus                         | 267    | -3.618  | -58 | -54 | 12  |
| R Middle Frontal Gyrus                          | 62     | -3.590  | 40  | 52  | 30  |
| R Hippocampus                                   | 100    | -3.418  | 32  | -20 | -12 |
| L Cerebellum                                    | 143    | -3.380  | -18 | -64 | -36 |
| R Lingual Gyrus                                 | 138    | -3.325  | 10  | -78 | 2   |
| Medial Occipital Lobe                           | 127    | -3.316  | 0   | -96 | -20 |
| R Inferior Temporal Gyrus                       | 62     | -3.309  | 52  | -20 | -36 |
| L Superior Frontal Gyrus                        | 137    | -3.295  | -26 | 54  | 36  |
| L Fusiform Gyrus                                | 110    | -3.268  | -26 | -20 | -46 |
| R Superior Medial Gyrus                         | 60     | -3.256  | 8   | 70  | 16  |
| L Inferior Temporal Gyrus                       | 53     | -3.247  | -52 | -30 | -30 |
| R Middle Temporal Gyrus                         | 161    | -3.216  | 64  | -36 | 0   |
| L Calcarine Gyrus                               | 284    | -3.214  | -6  | -98 | 2   |
| L Thalamus                                      | 50     | -3.200  | -14 | -28 | 10  |
| R IFG (p. Opercularis)                          | 169    | -3.084  | 52  | 12  | 40  |
| L Anterior Insula, L IFG (p. Orbitalis)         | 290    | -3.076  | -46 | 18  | -6  |
| L Putamen                                       | 92     | -3.064  | -18 | 20  | -4  |
| L Medial Temporal Pole                          | 130    | -3.063  | -36 | 14  | -32 |
| L Fusiform Gyrus                                | 96     | -3.015  | 26  | -18 | -34 |
| L Superior Medial Gyrus                         | 107    | -3.009  | 2   | 26  | 54  |
| R Superior Temporal Gyrus                       | 122    | -2.952  | 56  | -36 | 18  |
| R Brainstem, Pons                               | 194    | -2.952  | 12  | -40 | -34 |
| L Temporal Pole                                 | 59     | -2.937  | -34 | 4   | -50 |
| L Fusiform Gyrus                                | 160    | -2.935  | -22 | -36 | -16 |
| R Cerebellum                                    | 73     | -2.926  | 14  | -90 | -40 |
| L Superior Temporal Gyrus                       | 92     | -2.865  | -38 | -38 | 16  |
| L Inferior Parietal Lobule                      | 261    | -2.859  | -52 | -54 | 48  |
| L Angular Gyrus                                 | 261    | -2.583  | -32 | -56 | 42  |
| L Superior Temporal Gyrus                       | 261    | -2.537  | -64 | -54 | 28  |
| R Middle Temporal Gyrus                         | 53     | -2.859  | 42  | -60 | 12  |
| L Cerebellum                                    | 108    | -2.849  | -50 | -72 | -42 |
| L Gyrus, Rectus, Ventromedial Prefrontal Cortex | 123    | -2.845  | -6  | 48  | -24 |
| L Superior Orbital Gyrus                        | 123    | -2.306  | -8  | 24  | -20 |
| L Middle Frontal Gyrus                          | 64     | -2.825  | -44 | 18  | 44  |
| L Supplementary Motor Area                      | 100    | -2.811  | -2  | 6   | 50  |
| R Middle Occipital Gyrus                        | 85     | -2.728  | 38  | -90 | 12  |
| R Cerebellum                                    | 226    | -2.725  | 52  | -64 | -40 |
| R Putamen                                       | 164    | -2.720  | 18  | 8   | -4  |
| R Middle Temporal Gyrus                         | 138    | -2.713  | 60  | -58 | 22  |
| L Fusiform Gyrus                                | 73     | -2.699  | -24 | -50 | -10 |
| R Cerebellum                                    | 50     | -2.673  | 30  | -52 | -16 |
| R Supramarginal Gyrus                           | 113    | -2.666  | 54  | -38 | 44  |
| L Precentral Gyrus                              | 54     | -2.632  | -50 | 2   | 22  |
| L Paracentral Lobule                            | 81     | -2.599  | -10 | -22 | 54  |

|                           |    |        |     |     |     |
|---------------------------|----|--------|-----|-----|-----|
| L Inferior Temporal Gyrus | 53 | -2.478 | -52 | -12 | -22 |
| R Lingual Gyrus           | 74 | -2.418 | 24  | -98 | -14 |
| L Angular Gyrus           | 56 | -2.369 | -42 | -76 | 44  |

---

Note: t-values were determined by 1000 random permutations of Y vs. X to compute the standard deviation of the whole brain multivariate pattern under the null hypothesis of no association between the pattern and SBP reactivity. Regions were labeled in bspmview (<https://github.com/spunt/bspmview>). ACC, Anterior Cingulate Cortex; IFG: inferior frontal gyrus.

Figure S1. Machine learning methods and cross-validation.

(A) Input data

X(Nxv): Concatenated subjects' contrast maps (incongruent vs. congruent conditions). Each row of X contains a subject's contrast map data.

Y: Subjects' SBP reactivity (Nx1)

N: # of subjects; v: # of voxels

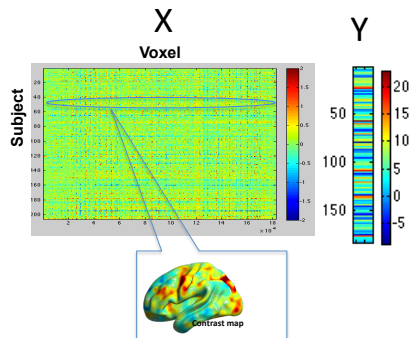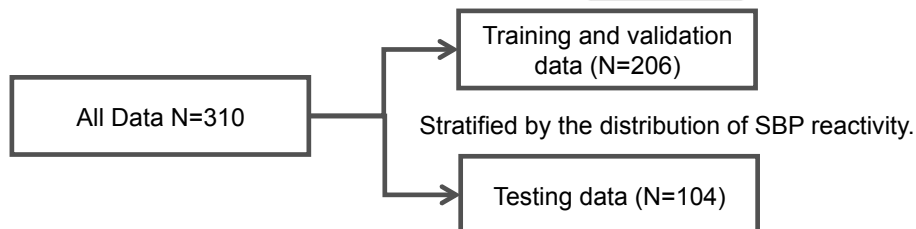

(B) Model selection for the optimal regularization parameter,  $\lambda^*$ , in LASSO-PCR regression procedure

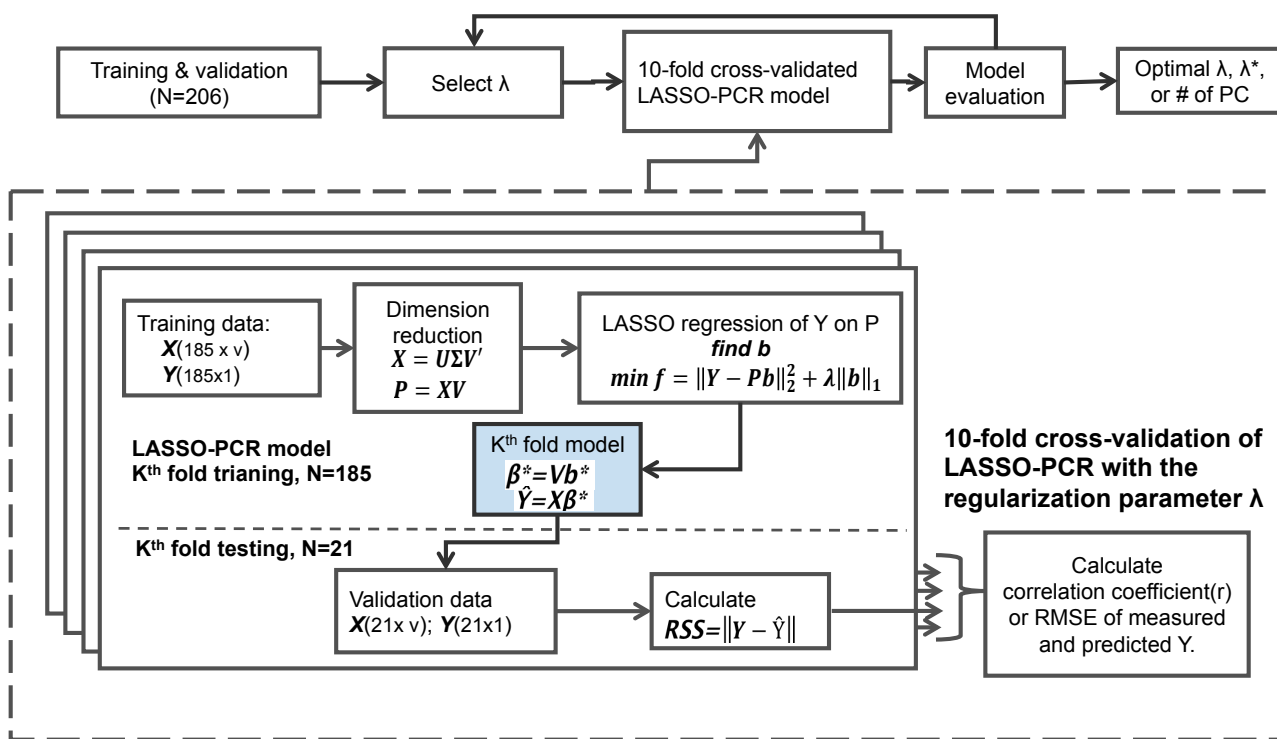

(C) Weight map and predicted model

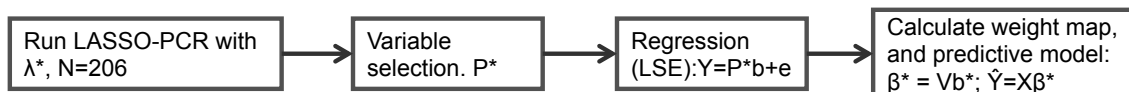



(D) Model performance testing

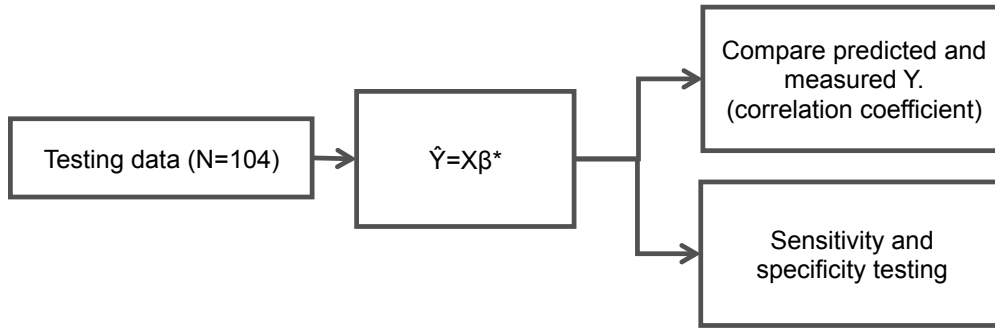

Figure S1. Schematic of machine learning procedure using LASSO-PCR, with 10-fold cross-validation. (A) Input data. (B) In each fold,  $k$ ,  $k=1, \dots, 10$ , brain activation maps from the training sample were concatenated ( $X$ ) and converted to a principal components' matrix,  $P$ , for a penalized regression model predicting SBP reactivity ( $Y$ ) on  $P$ . LASSO with a regularization parameter,  $\lambda$ , between 0 and 1 was used to fit the model. The fitted model was used to predict  $Y$  in the validation sample and compute the residual sum of square (RSE) for each fold. The root mean square error (RMSE), as well as the correlation of the predicted and measured  $Y$ , was summarized from all folds. The best  $\lambda$  that yielded the smallest RMSE was selected. (C) The regression of  $Y$  on the principal components was run with the best  $\lambda$ . Ordinary least square estimation was applied to fit the regression of  $Y$  on the selected components. The estimated coefficients were projected back to 3D voxel space to derive the final multivariate pattern (weight map,  $\beta^*$ ) to predict SBP reactivity ( $y$ ),  $y = x \beta^*$ . (D) As described in the Methods of the main text, the model was tested for accuracy using a separate and independent sample of subjects not used for training, the test sample.
